# Supplementary material for: Ubiquitin-Like Post-Translational Modifications (Ubl-PTMs): Small Peptides with Huge Impact in Liver Fibrosis
Source: Cells. 2019 Dec 4;8(12):1575. doi: 10.3390/cells8121575 (PMC6953033; doi:10.3390/cells8121575)
Supplement: Supplementary file 1 [file cells-08-01575-s001.xlsx]

## Sheet: Sheet1
UBIQUITIN
UNIPROT ENTRY	ENTRY NAME	PROTEIN NAME	GENE NAMES	ORGANISM	LENGTH
P0CG48	UBC_HUMAN	Polyubiquitin-C	UBC	Homo sapiens (Human)	685
P0CG50	UBC_MOUSE	Polyubiquitin-C	Ubc	Mus musculus (Mouse)	734
Q63429	UBC_RAT	Polyubiquitin-C	Ubc	Rattus norvegicus (Rat)	810
P0CG68	UBC_PIG	Polyubiquitin-C	UBC	Sus scrofa (Pig)	533
P0CH28	UBC_BOVIN	Polyubiquitin-C	UBC	Bos taurus (Bovine)	690
P0CG69	UBIQP_DROME	Polyubiquitin	Ubi-p63E Ubi-m, CG11624	Drosophila melanogaster (Fruit fly)	763
NEDD8
UNIPROT ENTRY	ENTRY NAME	PROTEIN NAME	GENE NAMES	ORGANISM	LENGTH
Q15843	NEDD8_HUMAN	NEDD8	NEDD8	Homo sapiens (Human)	81
P29595	NEDD8_MOUSE	NEDD8	Nedd8 Nedd-8	Mus musculus (Mouse)	81
Q9VJ33	NEDD8_DROME	NEDD8	Nedd8 CG10679	Drosophila melanogaster (Fruit fly)	84
Q93725	NEDD8_CAEEL	NEDD8	ned-8 F45H11.2	Caenorhabditis elegans	77
Q71UE8	NEDD8_RAT	NEDD8	Nedd8	Rattus norvegicus (Rat)	81
SUMO1
UNIPROT ENTRY	ENTRY NAME	PROTEIN NAME	GENE NAMES	ORGANISM	LENGTH
P63165	SUMO1_HUMAN	Small ubiquitin-related modifier 1	SUMO1 SMT3C, SMT3H3, UBL1, OK/SW-cl.43	Homo sapiens (Human)	101
P63166	SUMO1_MOUSE	Small ubiquitin-related modifier 1	Sumo1 Smt3c, Smt3h3, Ubl1	Mus musculus (Mouse)	101
Q5I0H3	SUMO1_RAT	Small ubiquitin-related modifier 1	Sumo1	Rattus norvegicus (Rat)	101
P55852	SUMO1_ARATH	Small ubiquitin-related modifier 1	SUMO1 SMT3, SUM1, At4g26840, F10M23.180	Arabidopsis thaliana (Mouse-ear cress)	100
A7WLH8	SUMO1_PIG	Small ubiquitin-related modifier 1	SUMO1	Sus scrofa (Pig)	101
Q5E9D1	SUMO1_BOVIN	Small ubiquitin-related modifier 1	SUMO1	Bos taurus (Bovine)	101
Q7SZR5	SUMO1_DANRE	Small ubiquitin-related modifier 1	sumo1 zgc:65934, zgc:85634	Danio rerio (Zebrafish) (Brachydanio rerio)	100
SUMO2
UNIPROT ENTRY	ENTRY NAME	PROTEIN NAME	GENE NAMES	ORGANISM	LENGTH
P61956	SUMO2_HUMAN	Small ubiquitin-related modifier 2	SUMO2 SMT3B, SMT3H2	Homo sapiens (Human)	95
P61957	SUMO2_MOUSE	Small ubiquitin-related modifier 2	Sumo2 Smt3b, Smt3h2	Mus musculus (Mouse)	95
P61959	SUMO2_RAT	Small ubiquitin-related modifier 2	Sumo2 Smt3a, Smt3h2	Rattus norvegicus (Rat)	95
Q9FLP6	SUMO2_ARATH	Small ubiquitin-related modifier 2	SUMO2 SUM2, At5g55160, MCO15.11	Arabidopsis thaliana (Mouse-ear cress)	103
P61958	SUMO2_PIG	Small ubiquitin-related modifier 2	SUMO2 SMT3A, SMT3H2	Sus scrofa (Pig)	95
P61955	SUMO2_BOVIN	Small ubiquitin-related modifier 2	SUMO2 SMT3B	Bos taurus (Bovine)	95
Q6DHL4	SUMO2_DANRE	Small ubiquitin-related modifier 2	sumo2 zgc:92241	Danio rerio (Zebrafish) (Brachydanio rerio)	96
SUMO3
UNIPROT ENTRY	ENTRY NAME	PROTEIN NAME	GENE NAMES	ORGANISM	LENGTH
P55854	SUMO3_HUMAN	Small ubiquitin-related modifier 3	SUMO3 SMT3A, SMT3H1	Homo sapiens (Human)	103
Q9Z172	SUMO3_MOUSE	Small ubiquitin-related modifier 3	Sumo3 Smt3a, Smt3h1	Mus musculus (Mouse)	110
Q5XIF4	SUMO3_RAT	Small ubiquitin-related modifier 3	Sumo3	Rattus norvegicus (Rat)	110
Q9FLP5	SUMO3_ARATH	Small ubiquitin-related modifier 3	SUMO3 SUM3, At5g55170, MCO15.12	Arabidopsis thaliana (Mouse-ear cress)	111
Q17QV3	SUMO3_BOVIN	Small ubiquitin-related modifier 3	SUMO3	Bos taurus (Bovine)	104
Q6DI05	SUMO3_DANRE	Small ubiquitin-related modifier 3	sumo3 sumo3b, zgc:86902	Danio rerio (Zebrafish) (Brachydanio rerio)	94
